# Supplementary material for: A novel random terpolymer for high-efficiency bulk-heterojunction polymer solar cells
Source: Royal Society of Chemistry journal article supplement (doi:10.1039/c6ra27518d), 2017-01-01
Supplement: c6ra27518d1.pdf [file c6ra27518d1.pdf]

## Electronic Supplementary Information

# A Novel Random Terpolymer for High-Efficiency Bulk-Heterojunction Polymer Solar Cells

Su-Mi Bang,<sup>‡a</sup> Sungkyoung Kang,<sup>‡b</sup> You-Sun Lee,<sup>a</sup> Bogyu Lim,<sup>\*b</sup> Hyojung Heo,<sup>c</sup> Jaechol Lee,<sup>b</sup> Youngu Lee,<sup>c</sup> and Seok-In Na<sup>\*a</sup>

*<sup>a</sup>Professional Graduate School of Flexible and Printable Electronics, Polymer Materials Fusion Research Center, Chonbuk National University, 664-14, Deokjin-dong, Deokjin-gu, Jeonju-si, Jeollabuk-do, 561-756, Republic of Korea*

*<sup>b</sup>Future Technology Research Center, Corporate R&D, LG Chem Research Park, 188, Moonji-ro, Yuseong-gu, Daejeon, 34122, Republic of Korea*

*<sup>c</sup>Department of Energy Systems Engineering, Daegu Gyeongbuk Institute of Science and Technology (DGIST), 333, Techno jungang-daero, Hyeonpung-Myeon, Dalseong-Gun, Daegu, 42988, Republic of Korea*

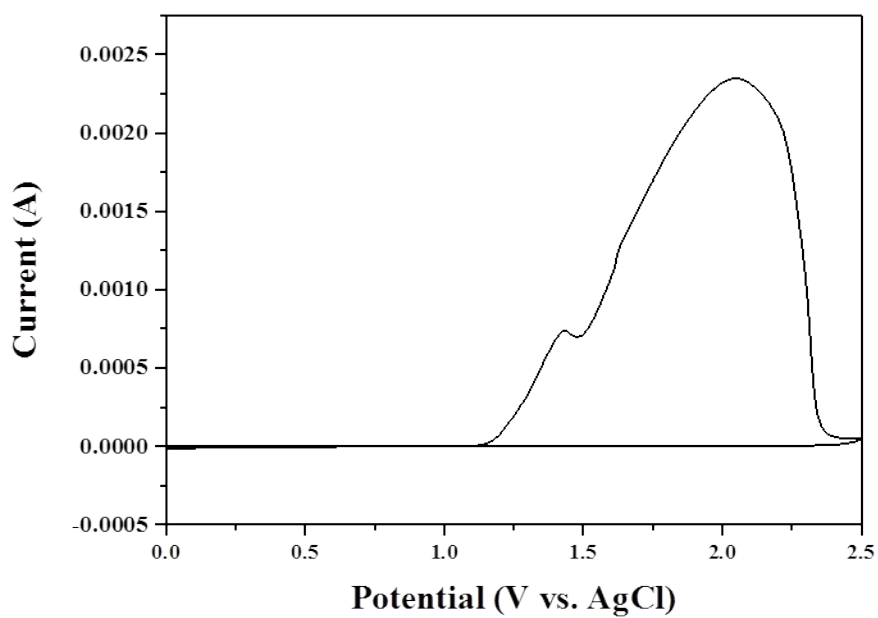

**Figure S1.** Cyclic voltammogram of LGC-D013

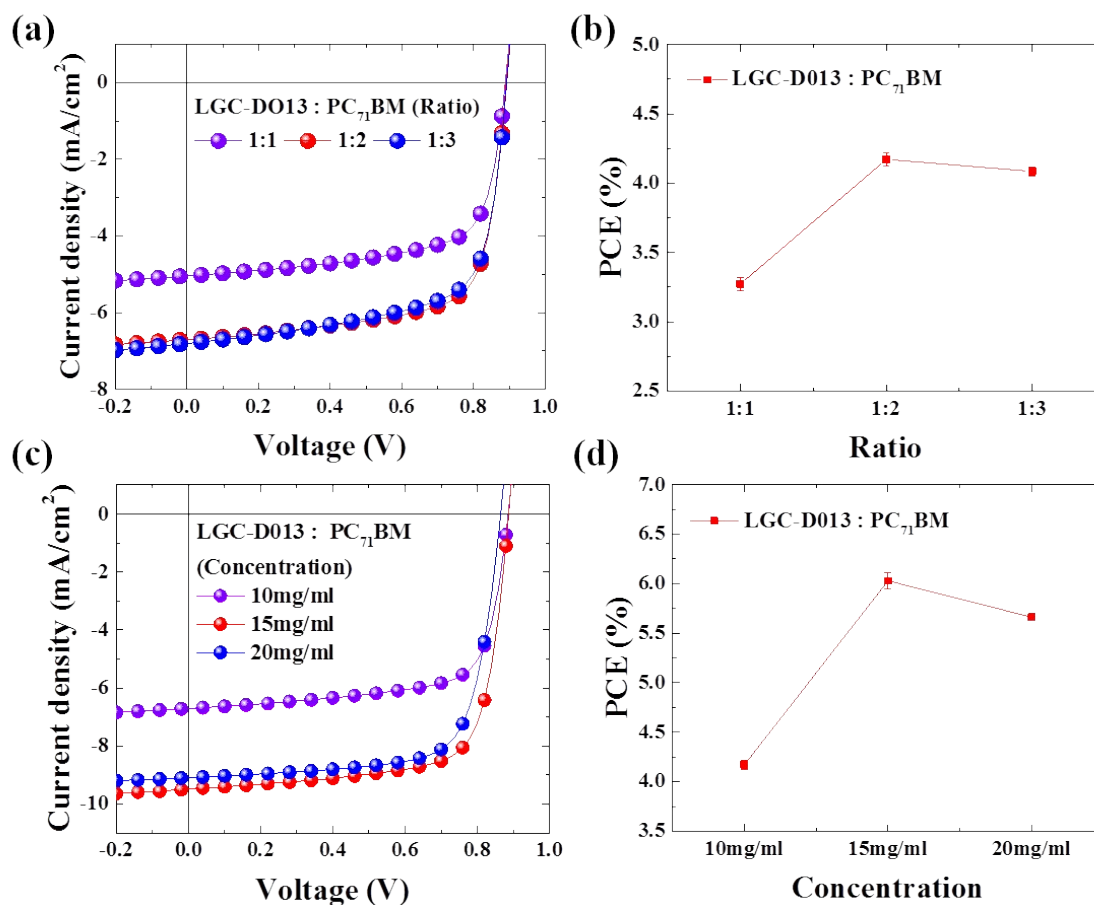

**Figure S2.** (a) The representative J–V curves for PSCs with various blend ratios (polymer:PC<sub>71</sub>BM). (b) PCE changes with different polymer:PC<sub>71</sub>BM ratios for LGC-D013 based devices. (c) The representative J–V curves for PSCs with various concentrations. (d) PCE changes with different concentrations for LGC-D013 based devices.

**Table S1.** Packing parameters derived from GIWAXS measurements.

| Films                            | Additive (DIO) | Crystallographic parameters    |                               |                             |                               |
|----------------------------------|----------------|--------------------------------|-------------------------------|-----------------------------|-------------------------------|
|                                  |                | Lamellar spacing               |                               |                             |                               |
|                                  |                | Face-on orientation            |                               | Edge-on orientation         |                               |
|                                  |                | $q_{xy}$ ( $\text{\AA}^{-1}$ ) | $d$ -spacing ( $\text{\AA}$ ) | $q_z$ ( $\text{\AA}^{-1}$ ) | $d$ -spacing ( $\text{\AA}$ ) |
| LGC-D013:<br>PC <sub>71</sub> BM | w/o            | 0.2445                         | 25.69                         | 0.2439                      | 25.76                         |
|                                  | 3%             | 0.2445                         | 25.69                         | 0.2479                      | 25.34                         |
